# Supplementary material for: Quantitative synthesis of bis(cyclic carbonate)s by iron catalyst for non-isocyanate polyurethane synthesis
Source: Royal Society of Chemistry journal article supplement (doi:10.1039/c4gc01294a), 2014-09-08
Supplement: c4gc01294a1.pdf [file c4gc01294a1.pdf]

## **ELECTRONIC SUPPLEMENTARY INFORMATION**

for

### **Quantitative Synthesis of Bis(cyclic carbonate)s by Iron Catalyst for Non-isocyanate Polyurethane Synthesis**

**Xingfeng Sheng,<sup>a,b</sup> Guanjie Ren,<sup>a,b</sup> Yusheng Qin,<sup>\*a</sup> Xuesi Chen,<sup>a</sup> Xianhong Wang,<sup>\*\*a</sup>**

**Fosong Wang<sup>a</sup>**

<sup>a</sup> Key Laboratory of Polymer Ecomaterials, Changchun Institute of Applied Chemistry,  
Chinese Academy of Sciences, Changchun 130022, People's Republic of China.

<sup>b</sup> University of Chinese Academy of Sciences, Beijing 100039, People's Republic of China

**\* CORRESPONDING AUTHOR: Dr. Yusheng Qin**

Fax: +86 431 85262252; Tel: +86 431 85262252; E-mail: [ysqin@ciac.jl.cn](mailto:ysqin@ciac.jl.cn)

**\*\* CORRESPONDING AUTHOR: Prof. Xianhong Wang**

Fax: +86 431 85689095; Tel: +86 431 85262250; E-mail: [xhwang@ciac.jl.cn](mailto:xhwang@ciac.jl.cn)

#### **Contents**

1. Detailed experimental results
2. DSC thermogram of various NIPUs.
3. TGA thermogram of various NIPUs.

## 1. Detailed experimental results

**Table S1** Coupling reaction of 1a/CO<sub>2</sub> catalyzed by Fe(BPMCDAC).<sup>a</sup>

| Entry | Cocatalyst | Conversion (%) <sup>b</sup> | TON <sup>c</sup> | TOF (h <sup>-1</sup> ) <sup>d</sup> |
|-------|------------|-----------------------------|------------------|-------------------------------------|
| 1     | TBAB       | 91                          | 910              | 455                                 |
| 2     | PPNCl      | 50                          | 500              | 250                                 |
| 3     | DMAP       | 42                          | 420              | 210                                 |

<sup>a</sup> Reaction conditions: 0.1 mol-% Fe(BPMCDAC), 0.1 mol-% cocatalyst (relative to epoxy group), 100 °C, 3 MPa CO<sub>2</sub> pressure, 2 h. <sup>b</sup> Conversion was determined by <sup>1</sup>H NMR spectroscopy. <sup>c</sup> Moles of epoxy group per mole of catalyst. <sup>d</sup> Moles of epoxy group produced per mole of catalyst per hour.

## 2. DSC thermograms of various NIPUs.

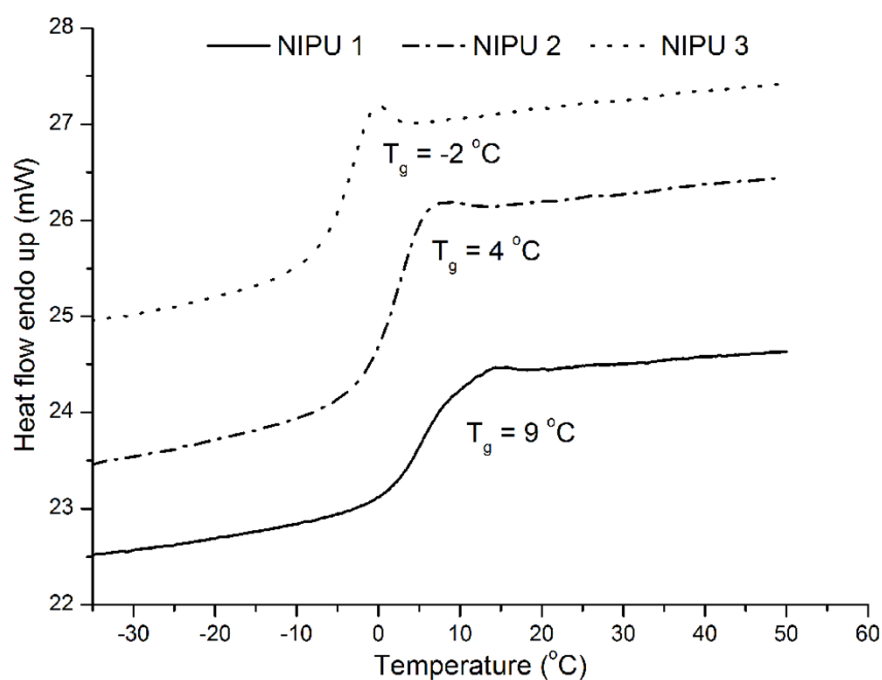

**Fig.S1** DSC thermograms of various NIPUs.

**3. TGA thermogram of various NIPUs.**

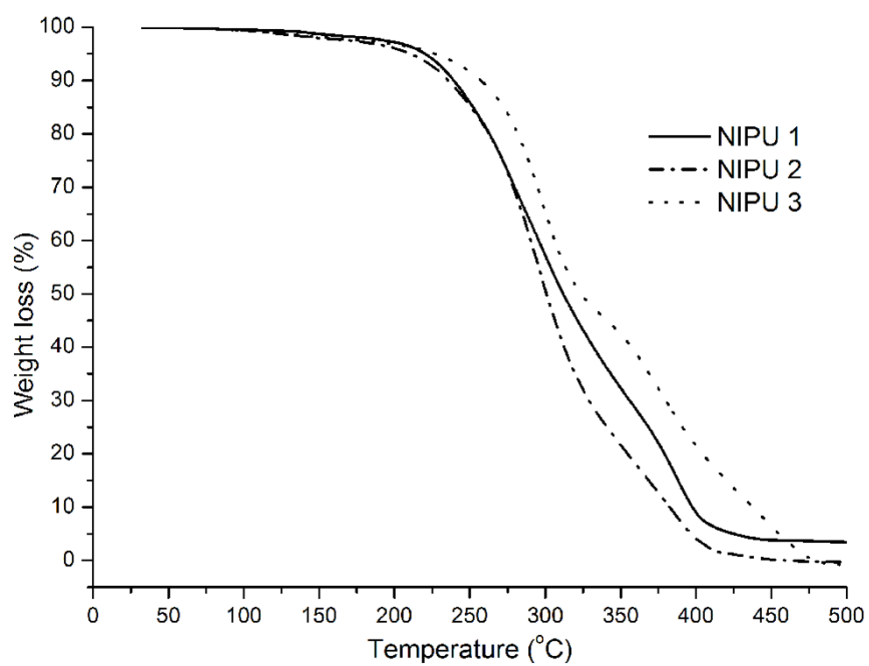

**Fig.S2** TGA thermogram of various NIPUs.
